# Supplementary material
Source: Springer Nature journal article supplement (https://www.springermedizin.de/resource/supplementary/12974_2008_167_MOESM8_ESM.pdf/9600916)

A

control

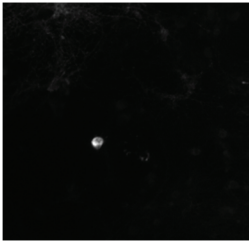

BDV infection

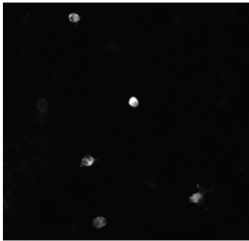

activated (AF5)  
astr media

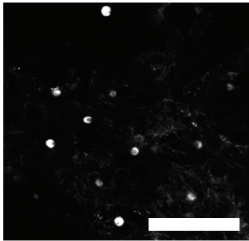

Supplement: MOESM8 [file 9600916]
